# Supplementary material for: Use of Social Media for Professional Development by Health Care Professionals: A Cross-Sectional Web-Based Survey
Source: PubMed Central journal article supplement (PMC5053809; doi:10.2196/mededu.6232), 2016-09-12

## How socially connected are you?

Dear health care professional,

Thank you for taking few minutes of your time to respond to this survey about your use of social media for professional purposes. Your participation will provide an insight on the perceptions of health care professionals living in the Arab region on the use of social media for their professional development.

If you have any questions or comments, please do not hesitate to contact me using the contact information below.

Best wishes.

Hana

Hana I. Alsobayel, BSc. PT, MSc., PhD.  
Assistant Professor in Physical Therapy  
King Saud University  
Saudi Arabia  
[hsobayel@ksu.edu.sa](mailto:hsobayel@ksu.edu.sa)

\* Required

## Social media network usage

### 1. Which of the following social media networks do you use? \*

You can select more than one network.

*Check all that apply.*

- Facebook
- Twitter
- Instagram
- LinkedIn
- Youtube
- Snapchat
- All of the above
- Other: .....

### 2. How much time do you usually spend using social media networks on a daily basis? \*

*Mark only one oval.*

- Less than an hour
- up to 2 hours
- up to 3 hours
- up to 4 hours
- 5 hours or more

**3. Do you use social media networks for professional purposes? \****Mark only one oval.* Yes No *Skip to question 7.***Professional use of social media networks****4. Rate your use of social media networks for professional purposes. \***

(e.g. networking, health promotion, etc.)

*Mark only one oval per row.*

|                                    | Never                 | Rarely                | Most of the time      | All the time          |
|------------------------------------|-----------------------|-----------------------|-----------------------|-----------------------|
| Facebook                           | <input type="radio"/> | <input type="radio"/> | <input type="radio"/> | <input type="radio"/> |
| Twitter                            | <input type="radio"/> | <input type="radio"/> | <input type="radio"/> | <input type="radio"/> |
| Instagram                          | <input type="radio"/> | <input type="radio"/> | <input type="radio"/> | <input type="radio"/> |
| Linkedin                           | <input type="radio"/> | <input type="radio"/> | <input type="radio"/> | <input type="radio"/> |
| Youtube                            | <input type="radio"/> | <input type="radio"/> | <input type="radio"/> | <input type="radio"/> |
| Snapchat                           | <input type="radio"/> | <input type="radio"/> | <input type="radio"/> | <input type="radio"/> |
| Other (as specified in question 1) | <input type="radio"/> | <input type="radio"/> | <input type="radio"/> | <input type="radio"/> |

**5. What are your reasons for using social media networks professionally? \***

You can select more than one reason.

*Check all that apply.* Networking Health promotion Knowledge exchange Employment/research opportunities Professional development Self promotion all of the above New update Other: .....

**6. Rate the impact of using social media networks on your professional development and practice. \***

*Mark only one oval per row.*

|                                                 | Not at all helpful    | Somewhat helpful      | Very helpful          | Extremely helpful     |
|-------------------------------------------------|-----------------------|-----------------------|-----------------------|-----------------------|
| Improving knowledge about the profession        | <input type="radio"/> | <input type="radio"/> | <input type="radio"/> | <input type="radio"/> |
| Improving clinical reasoning skills             | <input type="radio"/> | <input type="radio"/> | <input type="radio"/> | <input type="radio"/> |
| Improving critical thinking skills              | <input type="radio"/> | <input type="radio"/> | <input type="radio"/> | <input type="radio"/> |
| Improving clinical skills                       | <input type="radio"/> | <input type="radio"/> | <input type="radio"/> | <input type="radio"/> |
| Improving problem solving skills                | <input type="radio"/> | <input type="radio"/> | <input type="radio"/> | <input type="radio"/> |
| Improving creativity                            | <input type="radio"/> | <input type="radio"/> | <input type="radio"/> | <input type="radio"/> |
| Improving clinical/professional decision making | <input type="radio"/> | <input type="radio"/> | <input type="radio"/> | <input type="radio"/> |
| Improving patient outcomes                      | <input type="radio"/> | <input type="radio"/> | <input type="radio"/> | <input type="radio"/> |

## Personal information

This will be used for research purposes only.

**7. Your age in years \***

.....

**8. Your gender \***

*Mark only one oval.*

Male

Female

**9. Your nationality \***

.....

**10. Country you're living in \***

.....

**11. Which city? \***

.....

**12. Your professional qualification \***

*Check all that apply.*

Diploma

Bachelor

Masters

Doctorate

Other: .....

**13. Your line of work is mainly: \***

*Mark only one oval.*

- Academic
- Clinical
- Both
- Other: .....

**14. Number of years of clinical experience following your entry level education: \***

.....

**15. Comments**

.....  
.....  
.....  
.....  
.....

**16. Name and contact information**

(Optional)

.....  
.....  
.....  
.....  
.....

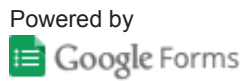

Supplement: mededu_v2i2e15_app1.pdf [file mededu_v2i2e15_app1.pdf]
